# Supplementary material
Source: MDPI journal article supplement (https://www.mdpi.com/2073-4336/10/3/32)
Supplement: s1 [file s1]

Table S1

Equivalence of deploying an *other-repeat* strategy (also Cournot's Second Best Response) and an unnatural *self-outcome* strategy

| TRIAL n      |             | STRATEGY                  | TRIAL n+1       | TRIAL n        | STRATEGY                   | TRIAL n+1       |
|--------------|-------------|---------------------------|-----------------|----------------|----------------------------|-----------------|
| <b>Other</b> | <b>Self</b> | <b><i>Other-cycle</i></b> | <b>Self</b>     | <b>Outcome</b> | <b><i>Self-outcome</i></b> | <b>Self</b>     |
| Rock         | Paper       | REPEAT                    | <b>Rock</b>     | Win            | WIN-DOWNGRADE              | <b>Rock</b>     |
| Rock         | Scissors    | REPEAT                    | <b>Rock</b>     | Lose           | LOSE-UPGRADE               | <b>Rock</b>     |
| Rock         | Rock        | REPEAT                    | <b>Rock</b>     | Draw           | DRAW-REPEAT                | <b>Rock</b>     |
| Paper        | Scissors    | REPEAT                    | <b>Paper</b>    | Win            | WIN-DOWNGRADE              | <b>Paper</b>    |
| Paper        | Rock        | REPEAT                    | <b>Paper</b>    | Lose           | LOSE-UPGRADE               | <b>Paper</b>    |
| Paper        | Paper       | REPEAT                    | <b>Paper</b>    | Draw           | DRAW-REPEAT                | <b>Paper</b>    |
| Scissors     | Rock        | REPEAT                    | <b>Scissors</b> | Win            | WIN-DOWNGRADE              | <b>Scissors</b> |
| Scissors     | Paper       | REPEAT                    | <b>Scissors</b> | Lose           | LOSE-UPGRADE               | <b>Scissors</b> |
| Scissors     | Scissors    | REPEAT                    | <b>Scissors</b> | Draw           | DRAW-REPEAT                | <b>Scissors</b> |

Table S2

Equivalence of deploying an *other-downgrade* strategy (also Cournot's Worse Response) and an unnatural *self-outcome* strategy

| TRIAL n      |             | STRATEGY                  | TRIAL n+1          | TRIAL n        | STRATEGY                   | TRIAL n+1       |
|--------------|-------------|---------------------------|--------------------|----------------|----------------------------|-----------------|
| <b>Other</b> | <b>Self</b> | <b><i>Other-cycle</i></b> | <b><i>Self</i></b> | <b>Outcome</b> | <b><i>Self-outcome</i></b> | <b>Self</b>     |
| Rock         | Paper       | DOWNGRADE                 | <b>Scissors</b>    | Win            | WIN-UPGRADE                | <b>Scissors</b> |
| Rock         | Scissors    | DOWNGRADE                 | <b>Scissors</b>    | Lose           | LOSE-REPEAT                | <b>Scissors</b> |
| Rock         | Rock        | DOWNGRADE                 | <b>Scissors</b>    | Draw           | DRAW-DOWNGRADE             | <b>Scissors</b> |
| Paper        | Scissors    | DOWNGRADE                 | <b>Rock</b>        | Win            | WIN-UPGRADE                | <b>Rock</b>     |
| Paper        | Rock        | DOWNGRADE                 | <b>Rock</b>        | Lose           | LOSE-REPEAT                | <b>Rock</b>     |
| Paper        | Paper       | DOWNGRADE                 | <b>Rock</b>        | Draw           | DRAW-DOWNGRADE             | <b>Rock</b>     |
| Scissors     | Rock        | DOWNGRADE                 | <b>Paper</b>       | Win            | WIN-UPGRADE                | <b>Paper</b>    |
| Scissors     | Paper       | DOWNGRADE                 | <b>Paper</b>       | Lose           | LOSE-REPEAT                | <b>Paper</b>    |
| Scissors     | Scissors    | DOWNGRADE                 | <b>Paper</b>       | Draw           | DRAW-DOWNGRADE             | <b>Paper</b>    |
